# Supplementary material
Source: Research Square preprint supplement (doi:10.21203/rs.3.rs-9440929/v1)
Supplement: Supplementary file 1 [file 1a73b076d3be70d8093771bd.pdf]

**ESM\_3** Hull values from Fig. 5 representing the Total Area, Standard Ellipse Area and the Corrected Standard Ellipse Area. Units are (%<sup>2</sup>).

| Species                      | Total Area | Standard Ellipse Area | Standard Ellipse Area (corrected) |
|------------------------------|------------|-----------------------|-----------------------------------|
| <i>Vallisneria americana</i> | 65.75      | 49.13                 | 52.19                             |
| <i>Myriophyllum spicatum</i> | 21.33      | 18.09                 | 19.90                             |
| <i>Fundulus grandis</i>      | 16.21      | 10.86                 | 11.70                             |
| <i>Menidia beryllina</i>     | 17.82      | 10.89                 | 11.50                             |
| <i>Lepomis macrochirus</i>   | 7.62       | 9.33                  | 10.67                             |
| <i>Sagittaria lancifolia</i> | 15.40      | 10.66                 | 11.48                             |
| <i>Juncus roemerianus</i>    | 16.01      | 8.57                  | 9.35                              |
| Benthic Macroalgae           | 7.08       | 7.73                  | 9.02                              |
| <i>Spartina alterniflora</i> | 8.62       | 7.53                  | 8.28                              |
| <i>Spartina cynosuroides</i> | 5.23       | 3.86                  | 4.15                              |
| <i>Ruppia maritima</i>       | 0.03       | 0.03                  | 0.03                              |
