# Supplementary material
Source: Research Square preprint supplement (doi:10.21203/rs.3.rs-9440929/v1)
Supplement: Supplementary file 2 [file 43c65e1116531375d3aa0511.pdf]

|         |                              |    |    |    |    |    |    |    |    |    |    |    |     |    |    |    |
|---------|------------------------------|----|----|----|----|----|----|----|----|----|----|----|-----|----|----|----|
|         | <i>Juncus roemerianus</i>    | 45 | 0  | 55 | 80 | 45 | 35 | 0  | 0  | 0  | 38 | 70 | 93  | 0  | 35 | 73 |
|         | <i>Phragmites australis</i>  | 0  | 3  | 0  | 0  | 0  | 0  | 0  | 0  | 0  | 0  | 0  | 0   | 0  | 0  | 0  |
|         | <i>Sagittaria lancifolia</i> | 0  | 0  | 0  | 0  | 0  | 0  | 0  | 0  | 0  | 0  | 0  | 0   | 0  | 0  | 5  |
|         | <i>Spartina alterniflora</i> | 0  | 93 | 0  | 0  | 0  | 0  | 50 | 70 | 60 | 0  | 0  | 0   | 30 | 43 | 0  |
|         | <i>Spartina cynosuroides</i> | 0  | 0  | 13 | 0  | 0  | 0  | 0  | 0  | 0  | 0  | 5  | 7.5 | 0  | 0  | 0  |
| 05/2022 | <i>Juncus roemerianus</i>    | 18 | 68 | 78 | 83 | 25 | 28 | 5  | 43 | 10 | 80 | 48 | 78  | 50 | 68 | 13 |
|         | <i>Sagittaria lancifolia</i> | 0  | 0  | 0  | 0  | 5  | 0  | 0  | 13 | 0  | 0  | 0  | 0   | 8  | 10 | 0  |
|         | <i>Spartina cynosuroides</i> | 8  | 13 | 8  | 0  | 0  | 10 | 0  | 0  | 0  | 10 | 13 | 2   | 0  | 0  | 0  |
|         | <i>Spartina patens</i>       | 0  | 0  | 0  | 0  | 50 | 25 | 0  | 5  | 0  | 5  | 0  | 5   | 0  | 0  | 0  |
