# Supplementary material
Source: Research Square preprint supplement (doi:10.21203/rs.3.rs-9440929/v1)
Supplement: Supplementary file 3 [file 8d490d0669f548c8eb7969da.pdf]

**ESM\_2** Percent cover vales of submerged aquatic vegetation, assumed to be *Vallisneria americana*. Q1-Q3 are 1-m<sup>2</sup> quadrats and values are represented as percentages of 100. During winter months, dead/wilted submerged aquatic vegetation percent cover was measured the same as live vegetation.

| Date    | Site 1 |     |     | Site 2 |     |     | Site 3 |     |     | Site 4 |     |     | Site 5 |     |     |
|---------|--------|-----|-----|--------|-----|-----|--------|-----|-----|--------|-----|-----|--------|-----|-----|
|         | Q1     | Q2  | Q3  |
| 07/2021 | 31     | 13  | 69  | 57     | 13  | 44  | 13     | 6   | 100 | 100    | 100 | 100 | 100    | 100 | 100 |
| 09/2021 | 100    | 100 | 100 | 100    | 100 | 100 | 100    | 0   | 81  | 100    | 100 | 100 | 100    | 0   | 56  |
| 11/2021 | 100    | 100 | 100 | 100    | 100 | 100 | 100    | 100 | 33  | 100    | 100 | 100 | 0      | 0   | 0   |
| 01/2022 | 100    | 100 | 100 | 0      | 0   | 6   | 6      | 100 | 100 | 0      | 0   | 0   | 0      | 100 | 50  |
| 03/2022 | 94     | 100 | 100 | 13     | 75  | 100 | 0      | 75  | 100 | 100    | 100 | 100 | 100    | 0   | 0   |
| 05/2022 | 88     | 94  | 100 | 100    | 100 | 56  | 100    | 100 | 100 | 100    | 100 | 100 | 0      | 0   | 13  |
