# Supplementary material
Source: Research Square preprint supplement (doi:10.21203/rs.3.rs-9440929/v1)
Supplement: Supplementary file 4 [file 91c7d7aa0b62301d2a2874cb.pdf]

**ESM\_4** Standard Ellipse Area using the Max Likely Overlap function for species' of interest. Calculated in a pairwise fashion. P = 0.95. Units are (%<sup>o</sup>)<sup>2</sup>.

| Species                      | <i>Menidia beryllina</i> | <i>Lepomis macrochirus</i> | <i>Fundulus grandis</i> |
|------------------------------|--------------------------|----------------------------|-------------------------|
| <i>Vallisneria americana</i> | 68.80                    | 59.12                      | 65.50                   |
| <i>Myriophyllum spicatum</i> | 58.23                    | 47.74                      | 39.69                   |
| <i>Juncus roemerianus</i>    | 9.07                     | 25.57                      | 2.80                    |
| Benthic Macroalgae           | 7.07                     | 6.68                       | 0.00                    |
| <i>Ruppia maritima</i>       | 0.21                     | 0.00                       | 0.00                    |
| <i>Spartina alterniflora</i> | 0.00                     | 0.00                       | 0.00                    |
| <i>Spartina cynosuroides</i> | 0.00                     | 0.00                       | 0.00                    |
